# Supplementary material for: Lithium-ion storage performance of camphoric carbon wrapped NiS nano/micro-hybrids
Source: Royal Society of Chemistry journal article supplement (doi:10.1039/c4ra00176a), 2014-01-01
Supplement: c4ra00176a1.pdf [file c4ra00176a1.pdf]

## Electronic Supporting Information

### Lithium-ion storage performance of camphoric carbon wrapped NiS nano/micro-hybrids

Sonia Theresa Sebastian, Roshny Siri Jagan, Ranjusha Rajagoplan, Anjali Paravannoor,

Lakshmi V. Menon, Shantikumar V. Nair<sup>#</sup>, Avinash Balakrishnan\*

Amrita Center for Nanosciences and Molecular Medicine,

Ponekkara, Kochi, 682041, India. Fax: +91-484-2802020;

Tel: +91-484-2802020; e-mail:avinash.balakrishnan@gmail.com, nairshanthi@gmail.com

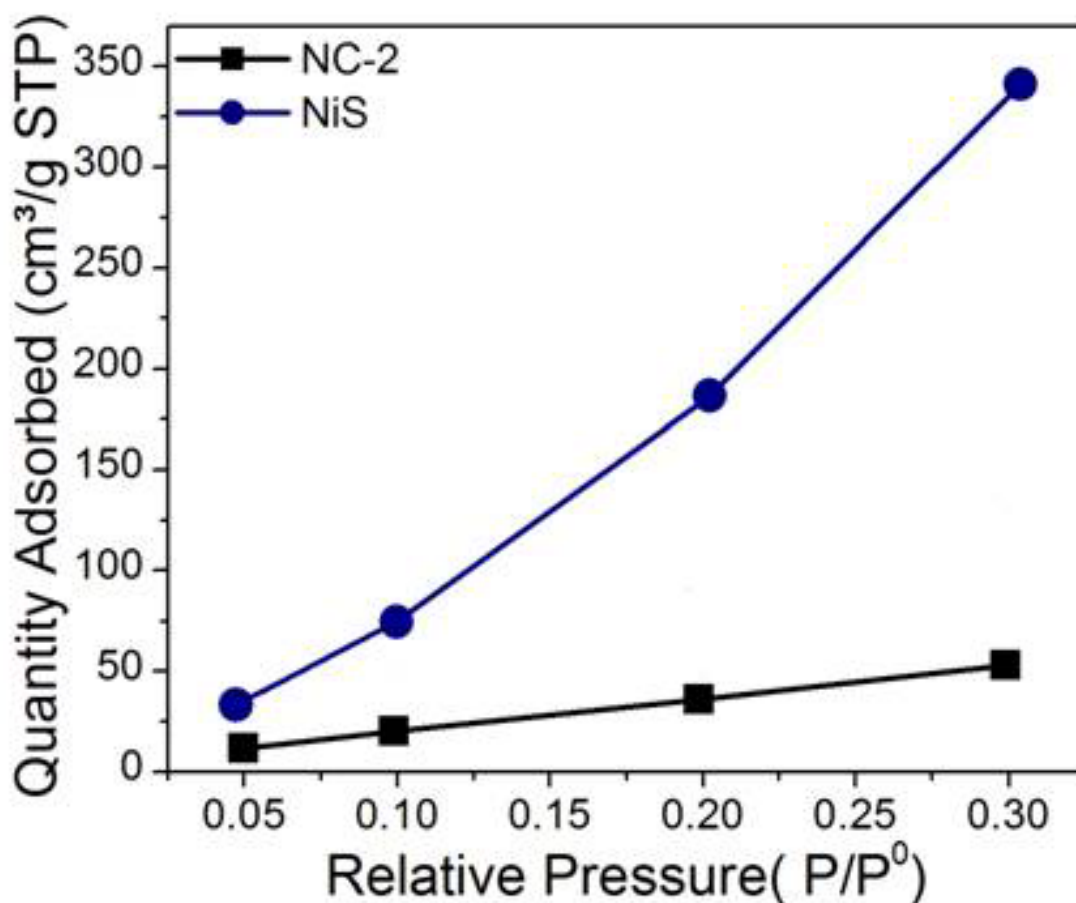

Fig. ESI-1. BET Analysis of NiS and NC-2 samples

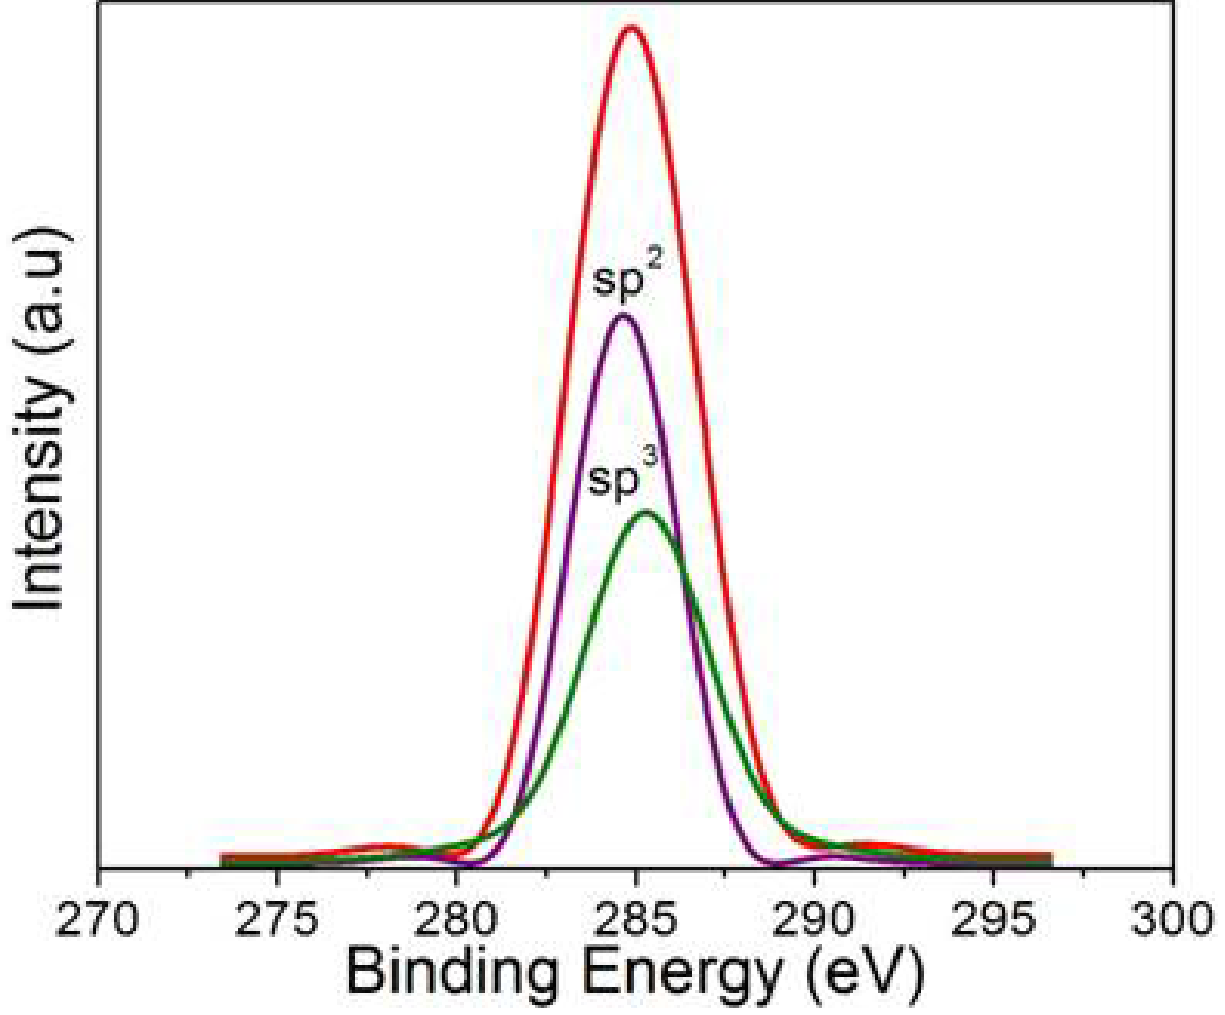

Fig. ESI-2. XPS of NC-2 samples (de-convoluted peaks of carbon)
